# Supplementary material for: Insights into the electronic, magnetic structure, and photocatalytic activity of Y2CuMnO6 double perovskite
Source: Royal Society of Chemistry journal article supplement (doi:10.1039/d4ra06357k), 2025-01-01
Supplement: d4ra06357k1.pdf [file d4ra06357k1.pdf]

## Supplementary information

### Insights into the Electronic, Magnetic Structure, and Photocatalytic Activity of $\text{Y}_2\text{CuMnO}_6$ Double Perovskite

Bhagyashree Munisha,<sup>1</sup> Lokanath Patra,<sup>2</sup> Jyotirmayee Nanda,<sup>3,\*</sup> and Sneha Mondal<sup>4</sup>

<sup>1</sup>Centre for Nanoscience and Nanotechnology, ITER, S'O'A Deemed to be University, Khandagiri, Bhubaneswar, 751030, Odisha, India

<sup>2</sup>G. W. Woodruff School of Mechanical Engineering, Georgia Institute of Technology, Atlanta, GA 30332, USA

<sup>3</sup>Department of Physics, ITER, S'O'A Deemed to be University, Khandagiri, Bhubaneswar, 751030, Odisha, India

<sup>4</sup>Department of Physics and Nanotechnology, Faculty of Engineering and Technology, SRM Institute of Science and Technology, Kattankulathur, Chennai, Tamil Nadu, 603203, India

\*Corresponding author Email Address: [jyotirmayeenanda@soa.ac.in](mailto:jyotirmayeenanda@soa.ac.in)

Figure S1 shows the comparative degradation performance of YCMO and P25  $\text{TiO}_2$  under a halogen lamp. The prepared catalyst YCMO shows faster degradation of organic pollutants in comparison with P25  $\text{TiO}_2$ . Table S1 shows the comparison of degradation percentage and rate constant.

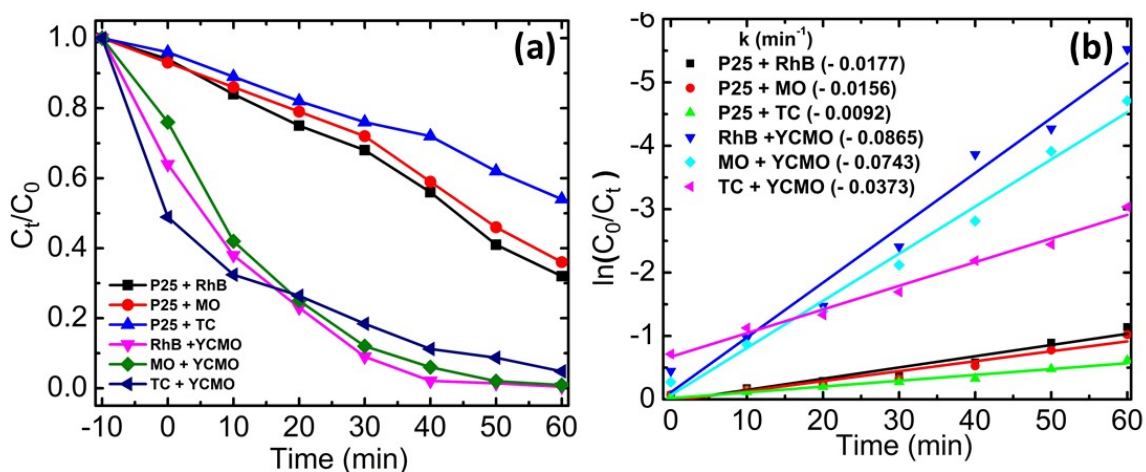

Figure S1. Degradation of RhB, MO and TC by P25  $\text{TiO}_2$  and YCMO (a)  $C_t/C_0$  graph and (b) Rate constant.

The lower efficiency of P25  $\text{TiO}_2$  photocatalysts for organic pollutant removal under halogen lamps is primarily due to the spectral characteristics of the light source. Halogen lamps primarily emit in the visible and infrared regions, with only a minimal amount of UV light, which is essential for P25  $\text{TiO}_2$  activation due to its bandgap energy of approximately 3.2 eV. In the absence of sufficient UV radiation, the generation of high-energy charge carriers becomes impossible. Furthermore, the UV light emitted by halogen lamps typically lacks the

intensity and penetration required to activate a substantial portion of the catalyst surface or to generate the reactive oxygen species necessary for the effective degradation of organic pollutants. For optimal performance of P25 TiO<sub>2</sub>, light sources with higher UV outputs, such as mercury or UV-LED lamps, are generally preferred.

Table S1. Comparative analysis of various pollutant degradation by P25 TiO<sub>2</sub> and YCMO

| Sample | Pollutant | Degradation Percentage (%) | Rate constant (k) (min <sup>-1</sup> ) |
|--------|-----------|----------------------------|----------------------------------------|
| P25    | RhB       | 68.4                       | 0.0177                                 |
| P25    | MO        | 64.7                       | 0.0156                                 |
| P25    | TC        | 56.2                       | 0.0092                                 |
| YCMO   | RhB       | 99.8                       | 0.0865                                 |
| YCMO   | MO        | 99.8                       | 0.0743                                 |
| YCMO   | TC        | 99.7                       | 0.0373                                 |

Table S2. Summary of catalyst performance in degradation studies.

| Catalyst Type                                                      | Synthesis Method                            | Light                      | Concentration (mg/L) | Photocatalyst Dosage (mg) | Degradation Time (min) | Degradation % | Ref. |
|--------------------------------------------------------------------|---------------------------------------------|----------------------------|----------------------|---------------------------|------------------------|---------------|------|
| Fe-TiO <sub>2</sub> /rGO                                           | Sol gel, Nanocomposite                      | Solar                      | 20                   | 600                       | 120                    | 91% (Rh-B)    | [1]  |
| CuBi <sub>2</sub> O <sub>4</sub> /ZnBi <sub>2</sub> O <sub>4</sub> | Hydrothermal, Hybrid nanostructure          | 50W LED                    | 10                   | 25                        | 150                    | 60% (Rh-B)    | [2]  |
| g-C <sub>3</sub> N <sub>4</sub> /BiVO <sub>4</sub>                 | Mixed Calcination, Z-Scheme Heterostructure | 500 W xenon lamp           | --                   | 50                        | 360                    | 85% (Rh-B)    | [3]  |
| Bi <sub>2</sub> O <sub>3</sub> /g-C <sub>3</sub> N <sub>4</sub>    | Hydrothermal, Nanocomposite                 | Xenon lamp                 | 10                   | 60                        | 150                    | 88.5% (Rh-B)  | [4]  |
| TiO <sub>2</sub> /BiVO <sub>4</sub>                                | Hydrothermal, Nanocomposite                 | Metal halide lamp with 400 | 10                   | 10                        | 120                    | 72% (TC)      | [5]  |

|                                                                     |                                       | W                                                      |    |     |     |                                        |      |
|---------------------------------------------------------------------|---------------------------------------|--------------------------------------------------------|----|-----|-----|----------------------------------------|------|
| CeMnO <sub>3</sub>                                                  | Citrate sol-gel, Nanoparticles        | 30 W LED bulb                                          | 10 | 30  | 90  | 95% (TC)                               | [6]  |
| La <sub>0.7</sub> Ca <sub>0.3</sub> MnO <sub>3</sub>                | Sol-gel method, Nanoparticles         | ----                                                   | 10 | 5   | 60  | 94% (TC)                               | [7]  |
| Bi <sub>4</sub> NbO <sub>8</sub> Cl                                 | Molten salt flux, Nanosheets          | 18W household LED bulb                                 | 10 | 20  | 60  | 82% (TC)                               | [8]  |
| LaCoO <sub>3</sub> /Bi <sub>4</sub> Ti <sub>3</sub> O <sub>12</sub> | Sol-gel, Composites                   | Xenon lamp                                             | 5  | 25  | 100 | 87% (TC)                               | [9]  |
| Sn-Doped TiO <sub>2</sub>                                           | Microwave-assisted sol-gel, Powder    | UV visible light                                       | -- | 5   | 120 | 90% (MO)                               | [10] |
| ZnO                                                                 | Coprecipitation method, Nanoparticles | Under sunlight                                         | 10 | 100 | 300 | 90% (MO)                               | [11] |
| ZnO_G                                                               | Forced solvolysis, Nanoparticles      | Visible light fluorescent lamp of 160 W/2900 lm LOHUIS | 20 | 12  | 60  | 91.07% (MO), 75.43% (RhB), 74.06% (MB) | [12] |
| Ce-Mo doped BiVO <sub>4</sub>                                       | Hydrothermal                          | Visible light (50W halogen lamp; λ>400 nm)             | 10 | 20  | 120 | 85% (MO)                               | [13] |
| BiVO <sub>4</sub> : Mo                                              | Green hydrothermal, Nanoparticles     | 300 W, visible light illumination using an Xe lamp     | 10 | 10  | 120 | 86.8% (Rh-B)                           | [14] |
| Zn <sup>2+</sup> : BiPO <sub>4</sub>                                | Hydrothermal, Rod-                    | 500 W xenon lamp                                       | 20 | 50  | 300 | 81.05% (TC), 91.25%                    | [15] |

|                                                        |                                         |                                     |    |     |     |                                 |           |
|--------------------------------------------------------|-----------------------------------------|-------------------------------------|----|-----|-----|---------------------------------|-----------|
|                                                        | shaped                                  |                                     |    |     |     | (RhB)                           |           |
| CDs/g-C <sub>3</sub> N <sub>4</sub> /BiPO <sub>4</sub> | High-temperature calcination, Composite | 500 W xenon lamp                    | 10 | 30  | 210 | 75.5% (TC)                      | [16]      |
| ZrO <sub>2</sub> -TiO <sub>2</sub>                     | Sol-gel, Nanocomposites                 | UV lamp (low-pressure mercury lamp) | 30 | 200 | 180 | 75.5% (MO), 78.1% (RhB)         | [17]      |
| P-25                                                   | ---                                     | UV lamp (low-pressure mercury lamp) | 20 | 200 | 180 | 90% (MO), 89.8% (RhB)           | [17]      |
| TiO <sub>2</sub>                                       | Solvothermal route, Nanorods            | 125 W mercury light                 | 10 | 50  | 50  | 90% (MO), 97% (RhB)             | [18]      |
| C@CuNi/TiO <sub>2</sub>                                | Microwave hydrothermal, Composite       | 500W xenon lamp                     | 10 | 10  | 180 | 94.5% (RhB), 70% (MB), 80% (TC) | [19]      |
| Y <sub>2</sub> CuMnO <sub>6</sub>                      | Auto combustion, Double perovskite      | Sunlight, Halogen lamp 500W         | 10 | 50  | 135 | 93% (RhB), 90% (MO), 82% (TC)   | This work |

## References:

- [1] A.A. Isari, A. Payan, M. Fattahi, S. Jorfi, B. Kakavandi, Photocatalytic degradation of rhodamine B and real textile wastewater using Fe-doped TiO<sub>2</sub> anchored on reduced graphene oxide (Fe-TiO<sub>2</sub>/rGO): Characterization and feasibility, mechanism and pathway studies, *Appl. Surf. Sci.* 462 (2018) 549–564. <https://doi.org/10.1016/j.apsusc.2018.08.133>.
- [2] S. et al Srinivasan, D., Karthik, D.R., Arjunan, In situ preparation of Z-scheme CuBi<sub>2</sub>O<sub>4</sub>/ZnBi<sub>2</sub>O<sub>4</sub> hybrid nanostructured for enhanced photocatalytic performance,

- Emergent Mater. (2024).
- [3] N. Tian, H. Huang, Y. He, Y. Guo, T. Zhang, Y. Zhang, Mediator-free direct Z-scheme photocatalytic system: BiVO<sub>4</sub>/g-C<sub>3</sub>N<sub>4</sub> organic-inorganic hybrid photocatalyst with highly efficient visible-light-induced photocatalytic activity, *Dalt. Trans.* 44 (2015) 4297–4307. <https://doi.org/10.1039/c4dt03905j>.
- [4] R. Ranjith, S. Vignesh, R. Balachandar, S. Suganthi, V. Raj, S. Ramasundaram, J. Kalyana Sundar, M. Shkir, T.H. Oh, Construction of novel g-C<sub>3</sub>N<sub>4</sub> coupled efficient Bi<sub>2</sub>O<sub>3</sub> nanoparticles for improved Z-scheme photocatalytic removal of environmental wastewater contaminant: Insight mechanism, *J. Environ. Manage.* 330 (2023) 117134. <https://doi.org/10.1016/j.jenvman.2022.117134>.
- [5] M. Liaqat, S. Kausar, T. Iqbal, S. Afsheen, A. Younas, M. Zubair, A. Syed, A.M. Elgorban, L.S. Wong, Synergistic Photocatalytic Activity of TiO<sub>2</sub>/BiVO<sub>4</sub> Nanocomposites: Optimization, Characterization, and Recyclability for Dye and Antibiotic Degradation, *J. Inorg. Organomet. Polym. Mater.* 34 (2024) 3115–3126. <https://doi.org/10.1007/s10904-024-03102-7>.
- [6] H.S. Anusha, S. Yadav, T. Tenzin, J.S. Prabagar, K.M. Anilkumar, W. Kitirote, H.P. Shivaraju, Improved CeMnO<sub>3</sub> perovskite framework for visible-light-aided degradation of tetracycline hydrochloride antibiotic residue and methylene blue dye, *Int. J. Environ. Sci. Technol.* 20 (2023) 13519–13534. <https://doi.org/10.1007/s13762-022-04742-3>.
- [7] Z. Li, W. Xie, F. Yao, A. Du, Q. Wang, Z. Guo, H. Gu, Comprehensive electrocatalytic degradation of tetracycline in wastewater by electrospun perovskite manganite nanoparticles supported on carbon nanofibers, *Adv. Compos. Hybrid Mater.* 5 (2022) 2092–2105. <https://doi.org/10.1007/s42114-022-00550-y>.
- [8] A. Majumdar, A. Pal, Optimized synthesis of Bi<sub>4</sub>NbO<sub>8</sub>Cl perovskite nanosheets for enhanced visible light assisted photocatalytic degradation of tetracycline antibiotics, *J. Environ. Chem. Eng.* 8 (2020) 103645. <https://doi.org/10.1016/j.jece.2019.103645>.
- [9] Z. Zhu, S. Wan, Q. Lu, Q. Zhong, Y. Zhao, Y. Bu, A highly efficient perovskite oxides composite as a functional catalyst for tetracycline degradation, *Sep. Purif. Technol.* 281 (2022) 119893. <https://doi.org/10.1016/j.seppur.2021.119893>.
- [10] L. Predoană, E.M. Ciobanu, G. Petcu, S. Preda, J. Pandele-Cușu, E.M. Anghel, S.V. Petrescu, D.C. Culiță, A. Băran, V.A. Surdu, B. Ștefan Vasile, A.C. Ianculescu, Photocatalytic Performance of Sn-Doped TiO<sub>2</sub> Nanopowders for Photocatalytic

- Degradation of Methyl Orange Dye, *Catalysts*. 13 (2023) 1–23. <https://doi.org/10.3390/catal13030534>.
- [11] M. Asif, M. Shafiq, F. Imtiaz, S. Ahmed, A.A. Alazba, H.N. Hussain, F.N. Butt, S.A. Zainab, M.K. Khan, M. Bilal, Photocatalytic Degradation of Methyl Orange from Aqueous Solution Using ZnO by Response Surface Methodology, *Top. Catal.* (2024). <https://doi.org/10.1007/s11244-024-01969-x>.
- [12] L. Motelica, O.C. Oprea, B.S. Vasile, A. Ficai, D. Ficai, E. Andronescu, A.M. Holban, Antibacterial Activity of Solvothermal Obtained ZnO Nanoparticles with Different Morphology and Photocatalytic Activity against a Dye Mixture: Methylene Blue, Rhodamine B and Methyl Orange, *Int. J. Mol. Sci.* 24 (2023). <https://doi.org/10.3390/ijms24065677>.
- [13] S. Sriwichai, S. Sakulsermsuk, S. Duangjam, K. Wetchakun, N. Wetchakun, Synergistic effects of Ce and Mo co-doping for enhancing photocatalytic activity of BiVO<sub>4</sub> on methyl orange degradation, *Mater. Sci. Semicond. Process.* 184 (2024). <https://doi.org/10.1016/j.mssp.2024.108791>.
- [14] C.Y. Tsay, C.Y. Chung, C.Y. Chen, Y.C. Chang, C.J. Chang, J.J. Wu, Enhanced Photocatalytic Performance of Visible-Light-Driven BiVO<sub>4</sub> Nanoparticles through W and Mo Substituting, *Catalysts*. 13 (2023) 475. <https://doi.org/10.3390/catal13030475>.
- [15] A. Chen, N. Wang, R. Lu, H. Zhang, W. Liu, T. Shang, Y. Xu, L. Ruyan, Z. Tian, G. Shijing, D. Jiang, Q. Zhan, Enhanced photodegradation performance of Zn-BiPO<sub>4</sub> on RhB and TC under the synergistic effect of oxygen vacancies and built-in electric field, *J. Alloys Compd.* 1007 (2024) 176418. <https://doi.org/10.1016/j.jallcom.2024.176418>.
- [16] and M.L. Wei Qian, Wangtong Hu , Zhifei Jiang , Yongyi Wu , Zihuan Li , Zenghui Diao, Degradation of Tetracycline Hydrochloride by a Novel CDs/g-C<sub>3</sub>N<sub>4</sub>/BiPO<sub>4</sub> under Visible-Light Irradiation: Reactivity and Mechanism, *Catal. Today*. 12 (2022).
- [17] V. Ruíz-Santoyo, O.A.G.V. and A.P.-L. , Virginia F. Marañon-Ruiz , Rafael Romero-Toledo, Photocatalytic Degradation of Rhodamine B and Methylene Orange Using TiO<sub>2</sub>-ZrO<sub>2</sub> as Nanocomposite Víctor, *Catalysts*. 11 (2021) 1–20.
- [18] R.B. Rajput, R.B. Kale, Photocatalytic activity of solvothermally synthesized rutile TiO<sub>2</sub> nanorods for the removal of water contaminants, *Mater. Sci. Eng. B.* 294 (2023) 116556. <https://doi.org/10.1016/j.mseb.2023.116556>.

- [19] Y. Yang, H. Shen, C. Ma, D. Li, B. Ma, Y. Lu, Y. Wang, Preparation of C@CuNi/TiO<sub>2</sub> with a local surface plasmon resonance for photocatalytic degradation of organic dyes and antibiotics under visible light irradiation, *Colloids Surfaces A Physicochem. Eng. Asp.* 703 (2024). <https://doi.org/10.1016/j.colsurfa.2024.135406>.
